# Supplementary material
Source: HighWire-hosted journal article supplement (http://www.qdcxjkg.com/highwire/filestream/126495/field_highwire_adjunct_files/4/ERJ-00937-2015_Figure_S5.pdf)

**A**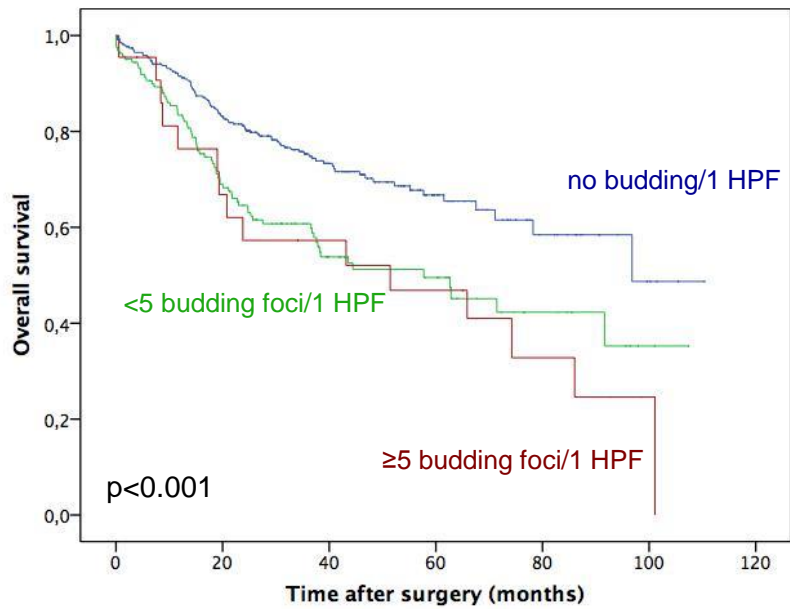**B**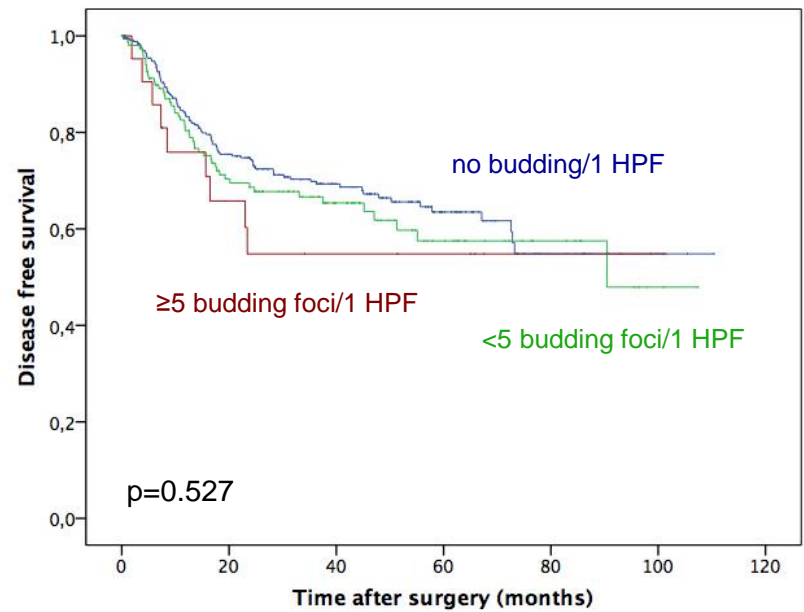**C**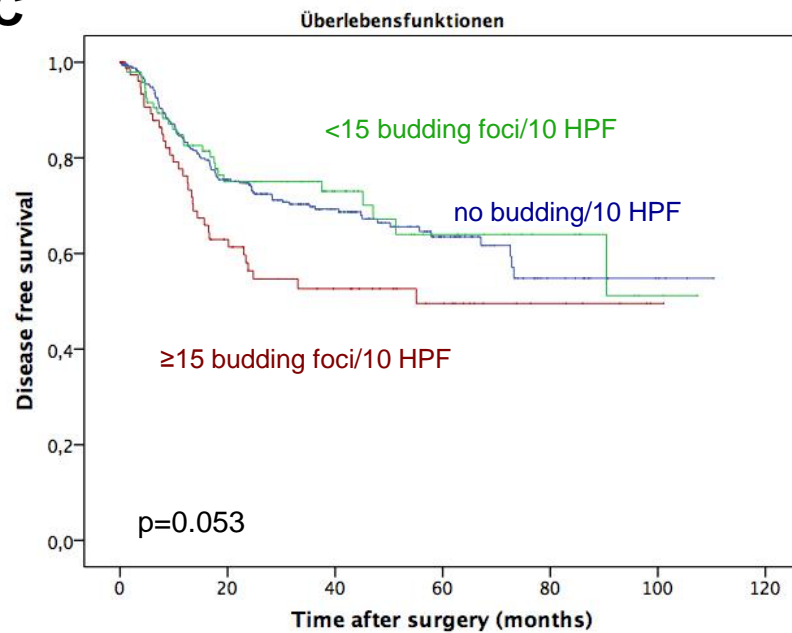

Supplement: ERJ-00937-2015_Figure_S5.pdf [file ERJ-00937-2015_Figure_S5.pdf]
